# Supplementary material for: Development of a Recombination System for the Generation of Occlusion Positive Genetically Modified Anticarsia Gemmatalis Multiple Nucleopolyhedrovirus
Source: MDPI journal article supplement (doi:10.3390/v7041599), 2015-03-31
Supplement: s1 [file s1]

# Supplementary Information

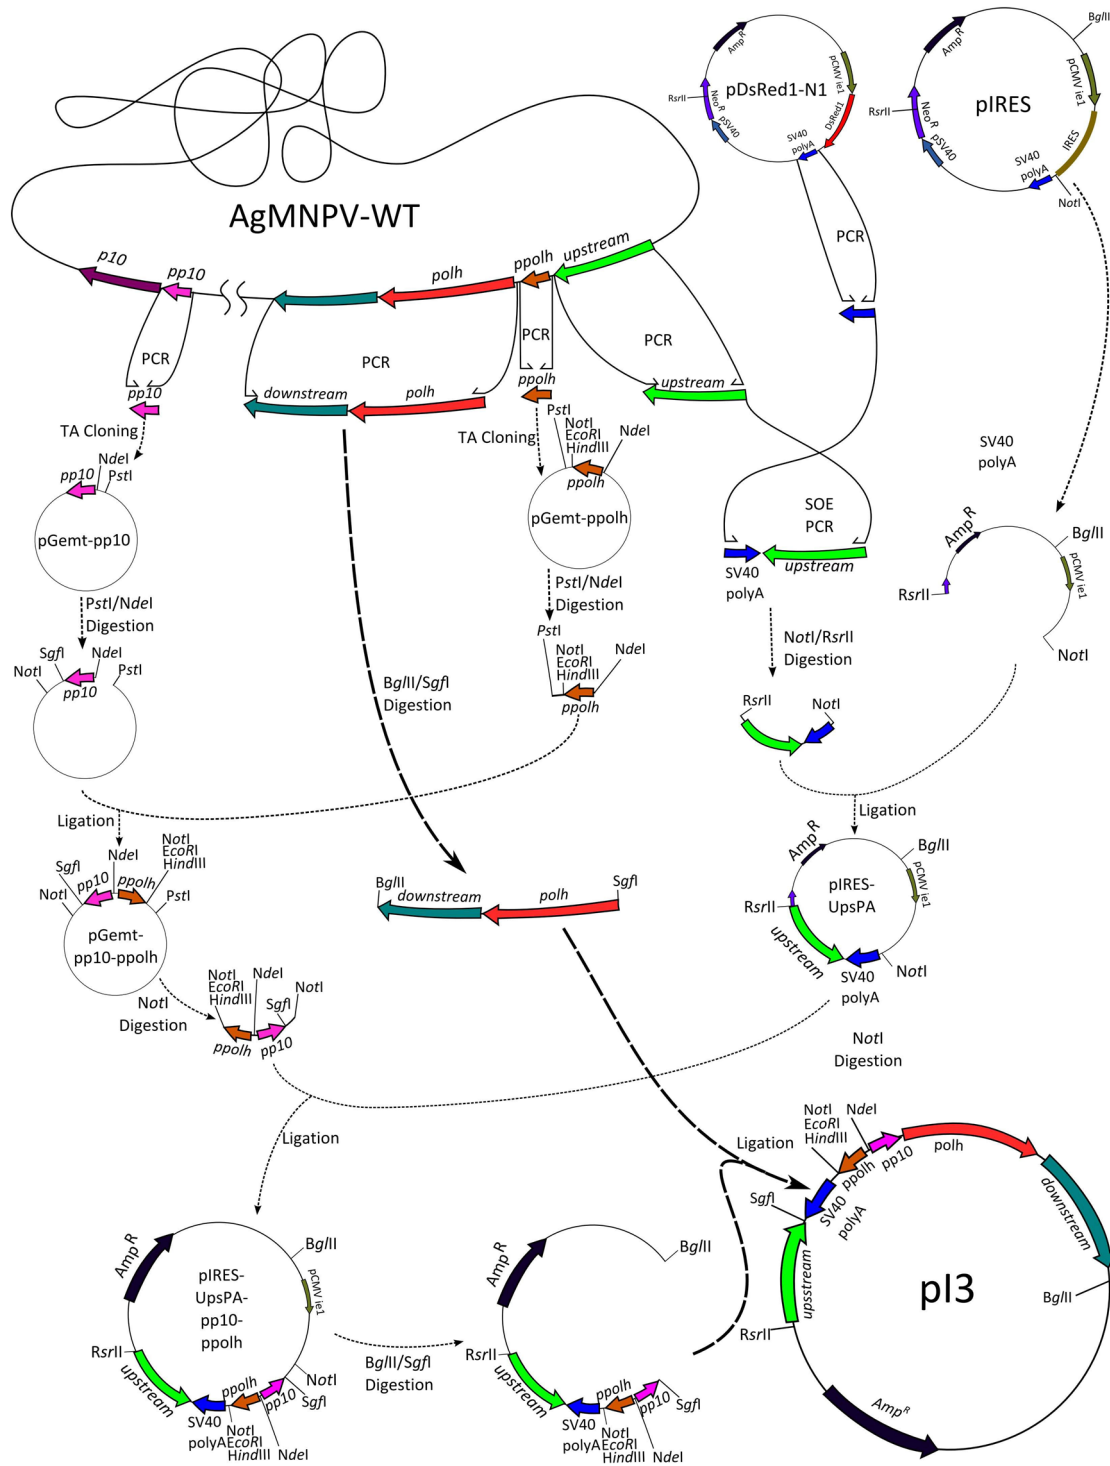

**Figure S1.** Schematic representation of the construction of p13 transfer vector. Details provided in Materials and Methods section.
